# Supplementary material for: High-depth whole-genome sequencing identifies structure variants, copy number variants and short tandem repeats associated with Parkinson’s disease
Source: Research Square preprint supplement (doi:10.21203/rs.3.rs-2409337/v1), 2023-01-27
Supplement: Supplementary file 1 [file 8b105f2c669689094f254d4a.xlsx]

## Sheet: Suuplementary data 3
Gene symbol	Panel	Gene symbol	Panel
ANK2	Dosage-sensitive	A2M	Loss-of-function tolerance
APC	Dosage-sensitive	ABCA10	Loss-of-function tolerance
BCL11B	Dosage-sensitive	ABCA8	Loss-of-function tolerance
CD2AP	Dosage-sensitive	ABCC11	Loss-of-function tolerance
COMT	Dosage-sensitive	ABCC12	Loss-of-function tolerance
CSF2RA	Dosage-sensitive	ABHD12B	Loss-of-function tolerance
DMPK	Dosage-sensitive	ABHD14B	Loss-of-function tolerance
DYRK1A	Dosage-sensitive	ACSBG2	Loss-of-function tolerance
EGR1	Dosage-sensitive	ACSM2A	Loss-of-function tolerance
EHMT1	Dosage-sensitive	ACSM2B	Loss-of-function tolerance
FGF10	Dosage-sensitive	ACSM3	Loss-of-function tolerance
FOXP1	Dosage-sensitive	ADAM2	Loss-of-function tolerance
FOXP2	Dosage-sensitive	ADPRHL1	Loss-of-function tolerance
GCH1	Dosage-sensitive	ADSSL1	Loss-of-function tolerance
GHRL	Dosage-sensitive	AHNAK2	Loss-of-function tolerance
GTF2I	Dosage-sensitive	AKAP3	Loss-of-function tolerance
HOXD13	Dosage-sensitive	ALDH1B1	Loss-of-function tolerance
IGF1	Dosage-sensitive	ANKRD30A	Loss-of-function tolerance
KCNQ2	Dosage-sensitive	ANKRD35	Loss-of-function tolerance
LMX1B	Dosage-sensitive	ANO5	Loss-of-function tolerance
MAPT	Dosage-sensitive	AP1G2	Loss-of-function tolerance
MC4R	Dosage-sensitive	APIP	Loss-of-function tolerance
NF1	Dosage-sensitive	APOBEC3A	Loss-of-function tolerance
NKX2-5	Dosage-sensitive	APOBEC3B	Loss-of-function tolerance
NLGN4X	Dosage-sensitive	ASB15	Loss-of-function tolerance
NLRP3	Dosage-sensitive	ASPSCR1	Loss-of-function tolerance
NPAS3	Dosage-sensitive	ATP10B	Loss-of-function tolerance
NSD1	Dosage-sensitive	ATP11A	Loss-of-function tolerance
PARK2	Dosage-sensitive	ATP12A	Loss-of-function tolerance
PAX6	Dosage-sensitive	ATP2C2	Loss-of-function tolerance
PIK3R1	Dosage-sensitive	BPHL	Loss-of-function tolerance
PRODH	Dosage-sensitive	BPIFA3	Loss-of-function tolerance
PTEN	Dosage-sensitive	BTN3A3	Loss-of-function tolerance
RELN	Dosage-sensitive	BTNL2	Loss-of-function tolerance
SATB2	Dosage-sensitive	BTNL8	Loss-of-function tolerance
SCN1A	Dosage-sensitive	BTNL9	Loss-of-function tolerance
SEMA5A	Dosage-sensitive	C10orf53	Loss-of-function tolerance
SHFM1	Dosage-sensitive	C11orf40	Loss-of-function tolerance
SHMT1	Dosage-sensitive	C1orf127	Loss-of-function tolerance
SNCA	Dosage-sensitive	C2orf40	Loss-of-function tolerance
SPR	Dosage-sensitive	C3orf14	Loss-of-function tolerance
ST7	Dosage-sensitive	C4orf46	Loss-of-function tolerance
TBX1	Dosage-sensitive	C4orf50	Loss-of-function tolerance
TCF4	Dosage-sensitive	C6	Loss-of-function tolerance
TGFB1	Dosage-sensitive	CABYR	Loss-of-function tolerance
TPM1	Dosage-sensitive	CAPN9	Loss-of-function tolerance
TSC1	Dosage-sensitive	CARD6	Loss-of-function tolerance
TSC2	Dosage-sensitive	CCDC121	Loss-of-function tolerance
WWOX	Dosage-sensitive	CCDC13	Loss-of-function tolerance
		CCDC60	Loss-of-function tolerance
		CCDC66	Loss-of-function tolerance
		CD180	Loss-of-function tolerance
		CD36	Loss-of-function tolerance
		CD96	Loss-of-function tolerance
		CDH19	Loss-of-function tolerance
		CDK11A	Loss-of-function tolerance
		CDKL2	Loss-of-function tolerance
		CELA1	Loss-of-function tolerance
		CEP72	Loss-of-function tolerance
		CES1	Loss-of-function tolerance
		CES5A	Loss-of-function tolerance
		CFHR1	Loss-of-function tolerance
		CFHR2	Loss-of-function tolerance
		CFHR3	Loss-of-function tolerance
		CHD1L	Loss-of-function tolerance
		CHIT1	Loss-of-function tolerance
		CHPF2	Loss-of-function tolerance
		CLCN1	Loss-of-function tolerance
		CLYBL	Loss-of-function tolerance
		CNKSR1	Loss-of-function tolerance
		COL16A1	Loss-of-function tolerance
		COL6A2	Loss-of-function tolerance
		COL6A5	Loss-of-function tolerance
		CPXM2	Loss-of-function tolerance
		CROT	Loss-of-function tolerance
		CRYGN	Loss-of-function tolerance
		CRYZ	Loss-of-function tolerance
		CSH1	Loss-of-function tolerance
		CTSE	Loss-of-function tolerance
		CYP2A6	Loss-of-function tolerance
		CYP2C8	Loss-of-function tolerance
		CYP2D6	Loss-of-function tolerance
		CYP2F1	Loss-of-function tolerance
		CYP3A5	Loss-of-function tolerance
		CYP4B1	Loss-of-function tolerance
		DCDC2B	Loss-of-function tolerance
		DCHS2	Loss-of-function tolerance
		DDX60	Loss-of-function tolerance
		DEFB126	Loss-of-function tolerance
		DHDH	Loss-of-function tolerance
		DMBT1	Loss-of-function tolerance
		DNAH7	Loss-of-function tolerance
		DQX1	Loss-of-function tolerance
		DUOX2	Loss-of-function tolerance
		ECT2L	Loss-of-function tolerance
		EFCAB13	Loss-of-function tolerance
		EFCAB3	Loss-of-function tolerance
		EFCAB5	Loss-of-function tolerance
		EFCAB6	Loss-of-function tolerance
		ENOSF1	Loss-of-function tolerance
		ENPEP	Loss-of-function tolerance
		EPPK1	Loss-of-function tolerance
		EPX	Loss-of-function tolerance
		ERAP1	Loss-of-function tolerance
		ERV3-1	Loss-of-function tolerance
		EXO5	Loss-of-function tolerance
		FAM129C	Loss-of-function tolerance
		FAM151A	Loss-of-function tolerance
		FAM187B	Loss-of-function tolerance
		FAM45A	Loss-of-function tolerance
		FAM81B	Loss-of-function tolerance
		FCGBP	Loss-of-function tolerance
		FCGR2A	Loss-of-function tolerance
		FCN3	Loss-of-function tolerance
		FLG	Loss-of-function tolerance
		FLG2	Loss-of-function tolerance
		FMO2	Loss-of-function tolerance
		FRG2B	Loss-of-function tolerance
		FUT2	Loss-of-function tolerance
		FUT6	Loss-of-function tolerance
		GADL1	Loss-of-function tolerance
		GBGT1	Loss-of-function tolerance
		GBP3	Loss-of-function tolerance
		GBP4	Loss-of-function tolerance
		GCFC2	Loss-of-function tolerance
		GH2	Loss-of-function tolerance
		GJB4	Loss-of-function tolerance
		GLB1L2	Loss-of-function tolerance
		GMPR	Loss-of-function tolerance
		GOLGA8S	Loss-of-function tolerance
		GP6	Loss-of-function tolerance
		GPATCH2L	Loss-of-function tolerance
		GRIN3B	Loss-of-function tolerance
		GRK7	Loss-of-function tolerance
		GYPB	Loss-of-function tolerance
		HELB	Loss-of-function tolerance
		HK3	Loss-of-function tolerance
		HLA-B	Loss-of-function tolerance
		HLA-DPA1	Loss-of-function tolerance
		HPSE	Loss-of-function tolerance
		HRG	Loss-of-function tolerance
		HRNR	Loss-of-function tolerance
		IDI2	Loss-of-function tolerance
		IFIH1	Loss-of-function tolerance
		IFNK	Loss-of-function tolerance
		IL17RC	Loss-of-function tolerance
		IL3RA	Loss-of-function tolerance
		IQCH	Loss-of-function tolerance
		ITIH1	Loss-of-function tolerance
		KIAA0753	Loss-of-function tolerance
		KIAA1257	Loss-of-function tolerance
		KIAA1586	Loss-of-function tolerance
		KIR3DL1	Loss-of-function tolerance
		KLK14	Loss-of-function tolerance
		KLK3	Loss-of-function tolerance
		KRT4	Loss-of-function tolerance
		KRT77	Loss-of-function tolerance
		KRT83	Loss-of-function tolerance
		LMF2	Loss-of-function tolerance
		LMO7	Loss-of-function tolerance
		LPA	Loss-of-function tolerance
		LRRC39	Loss-of-function tolerance
		LRTM1	Loss-of-function tolerance
		MANEA	Loss-of-function tolerance
		MAP3K4	Loss-of-function tolerance
		MAZ	Loss-of-function tolerance
		MCF2L	Loss-of-function tolerance
		MCOLN3	Loss-of-function tolerance
		MFSD9	Loss-of-function tolerance
		MGAM	Loss-of-function tolerance
		MLANA	Loss-of-function tolerance
		MMP10	Loss-of-function tolerance
		MOGAT1	Loss-of-function tolerance
		MOK	Loss-of-function tolerance
		MOXD1	Loss-of-function tolerance
		MS4A6A	Loss-of-function tolerance
		MST1	Loss-of-function tolerance
		MUC17	Loss-of-function tolerance
		MUC6	Loss-of-function tolerance
		MUTYH	Loss-of-function tolerance
		MYBBP1A	Loss-of-function tolerance
		MYH1	Loss-of-function tolerance
		MYH13	Loss-of-function tolerance
		MYH8	Loss-of-function tolerance
		MYO1A	Loss-of-function tolerance
		MYOC	Loss-of-function tolerance
		MYOF	Loss-of-function tolerance
		NAALAD2	Loss-of-function tolerance
		NBPF14	Loss-of-function tolerance
		NBPF15	Loss-of-function tolerance
		NEIL1	Loss-of-function tolerance
		NLRP13	Loss-of-function tolerance
		NLRP9	Loss-of-function tolerance
		NOP16	Loss-of-function tolerance
		NUDT8	Loss-of-function tolerance
		OARD1	Loss-of-function tolerance
		OBSCN	Loss-of-function tolerance
		OCEL1	Loss-of-function tolerance
		OR8S1	Loss-of-function tolerance
		PAPLN	Loss-of-function tolerance
		PDE11A	Loss-of-function tolerance
		PDIA2	Loss-of-function tolerance
		PGPEP1L	Loss-of-function tolerance
		PHRF1	Loss-of-function tolerance
		PKD1L2	Loss-of-function tolerance
		PKHD1L1	Loss-of-function tolerance
		PLA2G2C	Loss-of-function tolerance
		PLA2G4D	Loss-of-function tolerance
		PLA2R1	Loss-of-function tolerance
		PLEKHG7	Loss-of-function tolerance
		PLIN4	Loss-of-function tolerance
		PNLIPRP3	Loss-of-function tolerance
		POLM	Loss-of-function tolerance
		POTEH	Loss-of-function tolerance
		PPEF2	Loss-of-function tolerance
		PPL	Loss-of-function tolerance
		PPP1R3A	Loss-of-function tolerance
		PRAMEF2	Loss-of-function tolerance
		PRB1	Loss-of-function tolerance
		PRB2	Loss-of-function tolerance
		PRB4	Loss-of-function tolerance
		PSG1	Loss-of-function tolerance
		PSG11	Loss-of-function tolerance
		PSG4	Loss-of-function tolerance
		PSG9	Loss-of-function tolerance
		PTCHD3	Loss-of-function tolerance
		PTGDR	Loss-of-function tolerance
		PXDNL	Loss-of-function tolerance
		PZP	Loss-of-function tolerance
		RAI1	Loss-of-function tolerance
		RERGL	Loss-of-function tolerance
		RETSAT	Loss-of-function tolerance
		RFPL1	Loss-of-function tolerance
		RGPD4	Loss-of-function tolerance
		RGS11	Loss-of-function tolerance
		RHD	Loss-of-function tolerance
		RNF32	Loss-of-function tolerance
		ROPN1B	Loss-of-function tolerance
		RP1L1	Loss-of-function tolerance
		RPTN	Loss-of-function tolerance
		RTKN2	Loss-of-function tolerance
		RTP1	Loss-of-function tolerance
		SAMD11	Loss-of-function tolerance
		SEMG2	Loss-of-function tolerance
		SERHL2	Loss-of-function tolerance
		SERPINA10	Loss-of-function tolerance
		SERPINA9	Loss-of-function tolerance
		SERPINB3	Loss-of-function tolerance
		SFI1	Loss-of-function tolerance
		SIGLEC1	Loss-of-function tolerance
		SIGLEC5	Loss-of-function tolerance
		SLC17A9	Loss-of-function tolerance
		SLC22A10	Loss-of-function tolerance
		SLC22A14	Loss-of-function tolerance
		SLC22A25	Loss-of-function tolerance
		SLC26A10	Loss-of-function tolerance
		SLC5A4	Loss-of-function tolerance
		SLCO1B1	Loss-of-function tolerance
		SLFN13	Loss-of-function tolerance
		SPATA31A6	Loss-of-function tolerance
		SPATA4	Loss-of-function tolerance
		SPATC1	Loss-of-function tolerance
		SPNS3	Loss-of-function tolerance
		SULT1A2	Loss-of-function tolerance
		SULT1C4	Loss-of-function tolerance
		SYNM	Loss-of-function tolerance
		SYTL2	Loss-of-function tolerance
		TAF6	Loss-of-function tolerance
		TCF3	Loss-of-function tolerance
		TCHHL1	Loss-of-function tolerance
		TEKT3	Loss-of-function tolerance
		TGM4	Loss-of-function tolerance
		THBS4	Loss-of-function tolerance
		THEM5	Loss-of-function tolerance
		TIGD6	Loss-of-function tolerance
		TLR10	Loss-of-function tolerance
		TLR5	Loss-of-function tolerance
		TMC2	Loss-of-function tolerance
		TMEM82	Loss-of-function tolerance
		TMIE	Loss-of-function tolerance
		TMPRSS7	Loss-of-function tolerance
		TNN	Loss-of-function tolerance
		TRIM22	Loss-of-function tolerance
		TRIM45	Loss-of-function tolerance
		TRIM48	Loss-of-function tolerance
		TRIM59	Loss-of-function tolerance
		TRMT10B	Loss-of-function tolerance
		TRMT2A	Loss-of-function tolerance
		TTC38	Loss-of-function tolerance
		TTN	Loss-of-function tolerance
		UGT2B10	Loss-of-function tolerance
		UGT2B17	Loss-of-function tolerance
		UGT2B28	Loss-of-function tolerance
		UMODL1	Loss-of-function tolerance
		UNC93A	Loss-of-function tolerance
		UPB1	Loss-of-function tolerance
		UPK3A	Loss-of-function tolerance
		UPP2	Loss-of-function tolerance
		USP45	Loss-of-function tolerance
		USP6	Loss-of-function tolerance
		VILL	Loss-of-function tolerance
		VWA3B	Loss-of-function tolerance
		VWA7	Loss-of-function tolerance
		WDR27	Loss-of-function tolerance
		WDR90	Loss-of-function tolerance
		XIRP1	Loss-of-function tolerance
		XRRA1	Loss-of-function tolerance
		ZAN	Loss-of-function tolerance
		ZNF223	Loss-of-function tolerance
		ZNF229	Loss-of-function tolerance
		ZNF257	Loss-of-function tolerance
		ZNF30	Loss-of-function tolerance
		ZNF343	Loss-of-function tolerance
		ZNF396	Loss-of-function tolerance
		ZNF417	Loss-of-function tolerance
		ZNF486	Loss-of-function tolerance
		ZNF528	Loss-of-function tolerance
		ZNF544	Loss-of-function tolerance
		ZNF587	Loss-of-function tolerance
		ZNF599	Loss-of-function tolerance
		ZNF611	Loss-of-function tolerance
		ZNF790	Loss-of-function tolerance
		ZNF83	Loss-of-function tolerance
		ZNF831	Loss-of-function tolerance
		ZNF844	Loss-of-function tolerance
		ZNF846	Loss-of-function tolerance
		ZNF860	Loss-of-function tolerance
		ZNF878	Loss-of-function tolerance
		ZNF92	Loss-of-function tolerance
		ZRANB3	Loss-of-function tolerance
