# Supplementary material for: High-depth whole-genome sequencing identifies structure variants, copy number variants and short tandem repeats associated with Parkinson’s disease
Source: Research Square preprint supplement (doi:10.21203/rs.3.rs-2409337/v1), 2023-01-27
Supplement: Supplementary file 2 [file 8b736eabb8227a92995cf6f1.xlsx]

## Sheet: Supplementary data 1
	Cases	Controls	Overall
	(N=466)	(N=513)	(N=979)
Sex
Female	193 (41.4%)	309 (60.2%)	502 (51.3%)
Male	273 (58.6%)	204 (39.8%)	477 (48.7%)
Age (year)
Mean (SD)	61.3 (8.49)	71.9 (6.66)	66.9 (9.24)
Median [Min, Max]	63.0 [38.0, 82.0]	73.0 [50.0, 88.0]	68.0 [38.0, 88.0]
Sequencing base (Gb)
Mean (SD)	136 (15.9)	138 (13.4)	137 (14.7)
Median [Min, Max]	139 [41.5, 225]	139 [42.0, 217]	139 [41.5, 225]
Depth (×)
Mean (SD)	44.0 (5.13)	44.6 (4.35)	44.3 (4.75)
Median [Min, Max]	44.9 [13.4, 72.8]	45.1 [13.6, 70.3]	45.0 [13.4, 72.8]
Coverage
Mean (SD)	0.957 (0.000207)	0.957 (0.000213)	0.957 (0.000218)
Median [Min, Max]	0.957 [0.956, 0.958]	0.957 [0.956, 0.958]	0.957 [0.956, 0.958]
SV
Mean (SD)	3110 (110)	3130 (136)	3120 (124)
Median [Min, Max]	3100 [2900, 4440]	3100 [2820, 4520]	3100 [2820, 4520]
CNV
Mean (SD)	2200 (241)	2360 (549)	2280 (438)
Median [Min, Max]	2190 [1550, 3930]	2210 [1680, 4980]	2200 [1550, 4980]
kSTR
Mean (SD)	110000 (1220)	110000 (1130)	110000 (1190)
Median [Min, Max]	110000 [103000, 123000]	110000 [99700, 123000]	110000 [99700, 123000]
dSTR
Mean (SD)	546 (92.4)	561 (98.6)	554 (95.9)
Median [Min, Max]	557 [114, 887]	564 [143, 895]	559 [114, 895]
