# Supplementary material for: High-depth whole-genome sequencing identifies structure variants, copy number variants and short tandem repeats associated with Parkinson’s disease
Source: Research Square preprint supplement (doi:10.21203/rs.3.rs-2409337/v1), 2023-01-27
Supplement: Supplementary file 3 [file ed7ae6b5399975e18f9b29b7.xlsx]

## Sheet: Sheet1
Gene	Type	MAF		P-value
		Case	Control
ADK
10:74450901-74454300	DEL	0.0023	0.0021	0.478811
10:74511401-74514900	DEL	0.0023	0.0021	0.478811
10:74217501-74222600	DUP	0.0023	0.0085	0.897306
10:74568901-74573800	DUP	0.0046	0.0128	0.904395
10:74602701-74607900	DUP	0.0023	0.0255	0.998386
Sum	DEL	0.0046	0.0043	0.468695
	DUP	0.0092	0.0383	0.997875
DNAJB2
2:219268301-219284600	DUP	0.0023	0.0021	0.480056
GBA
1:155235101-155241500	DEL	0.0046	0.0021	0.26036
1:155213201-155252500	DUP	0.0183	0.0085	0.099601
MAPT
17:45963701-45966000	DEL	0.0046	0	0.071111
PRKN
6:161839901-161959800	DEL	0.0046	0.0043	0.471335
6:161960101-161983200	DEL	0.0023	0.0021	0.480056
6:161983501-162113800	DEL	0.0092	0.0064	0.316205
6:162519301-162645400	DEL	0	0.0064	0.952673
6:162645701-162740200	DEL	0	0.0043	0.913782
6:161875301-161900600	DUP	0.0023	0.0021	0.480056
6:161902601-161983600	DUP	0.0023	0.0043	0.696568
6:161983801-162009800	DUP	0	0.0043	0.913782
6:162011601-162024000	DUP	0	0.0043	0.913782
6:162503201-162510300	DUP	0	0.0043	0.913782
Sum	DEL	0.0138	0.0149	0.562
	DUP	0.0023	0.0085	0.896239
SNCA
4:89776701-89780500	DEL	0.0023	0.0064	0.823645
4:89700301-89772500	DUP	0	0.0043	0.913782
SPG7
16:89472001-89503500	DUP	0.0023	0.0043	0.69746
VPS13C
15:61861901-61868100	DEL	0.0115	0.0064	0.208317
15:62010401-62013500	DEL	0.0046	0	0.071111
15:62015901-62037500	DEL	0.0069	0.0106	0.730104
15:61896201-61902200	DUP	0.0023	0.0085	0.896951
15:62016401-62019500	DUP	0	0.0043	0.913782
Sum	DEL	0.0138	0.0149	0.562972
	DUP	0.0023	0.0106	0.939217
